# Supplementary material for: Engineering peptide-based biomimetic enzymes for enhanced catalysis
Source: Royal Society of Chemistry journal article supplement (doi:10.1039/c6ra05778k), 2016-01-01
Supplement: c6ra05778k1.pdf [file c6ra05778k1.pdf]

## Supporting Information

### Engineering peptide-based biomimetic enzymes for enhanced catalysis

**Guohua Zhang,<sup>a</sup> Renliang Huang,<sup>\*b</sup> Wei Qi,<sup>\*acd</sup> Yuefei Wang,<sup>a</sup> Rongxin Su,<sup>acd</sup>  
and Zhimin He<sup>a</sup>**

<sup>a</sup> State Key Laboratory of Chemical Engineering, School of Chemical Engineering and  
Technology, Tianjin University, Tianjin 300072, P. R. China

<sup>b</sup> Tianjin Engineering Center of Biomass-derived Gas/Oil Technology, School of Environmental  
Science and Engineering, Tianjin University, Tianjin 300072, P. R. China

<sup>c</sup> Collaborative Innovation Center of Chemical Science and Engineering (Tianjin), Tianjin 300072,  
P. R. China

<sup>d</sup> Tianjin Key Laboratory of Membrane Science and Desalination Technology, Tianjin University,  
Tianjin 300072, P. R. China

\*E-mail: [tjuhrl@tju.edu.cn](mailto:tjuhrl@tju.edu.cn) (R. H.); [qiwei@tju.edu.cn](mailto:qiwei@tju.edu.cn) (W. Q.), Tel: +86 22 27407799

## Supplementary Figures

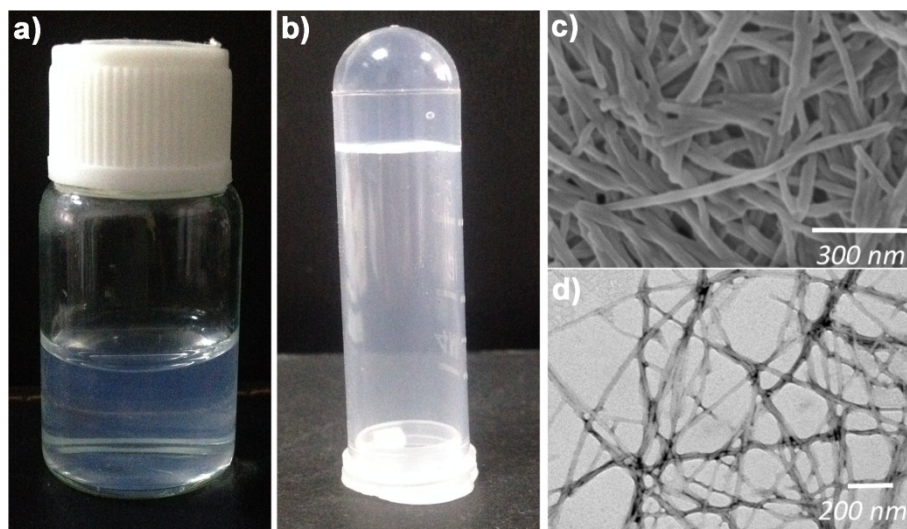

**Fig. S1** a-b) Photograph of Fmoc-FFH solution and Fmoc-FFH hydrogels, respectively. c-d) SEM and TEM image of Fmoc-FFH nanofibers.

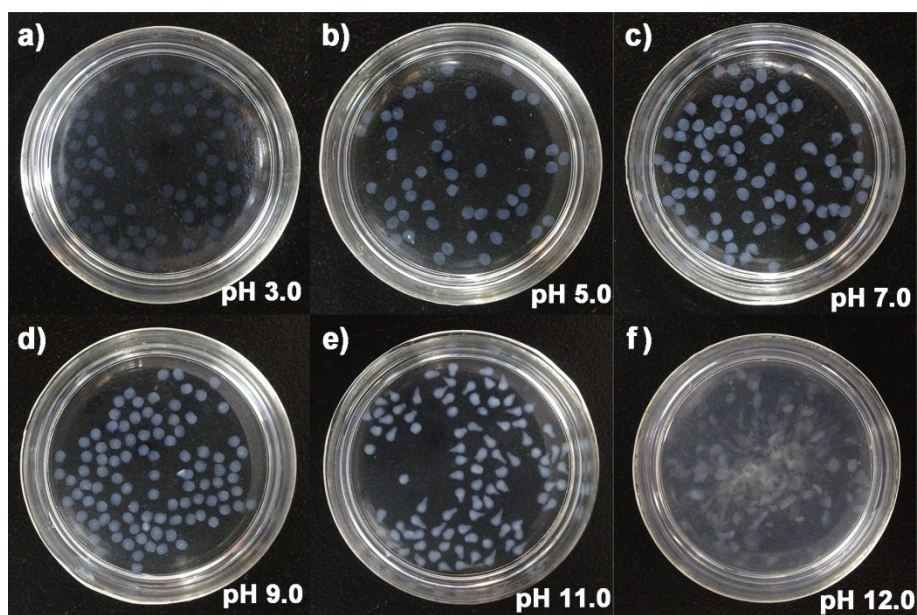

**Fig. S2** Photograph of Fmoc-FFH/PEI capsules formed in 1.0wt% PEI solutions with different pH values ranging from 3.0 to 12.0.

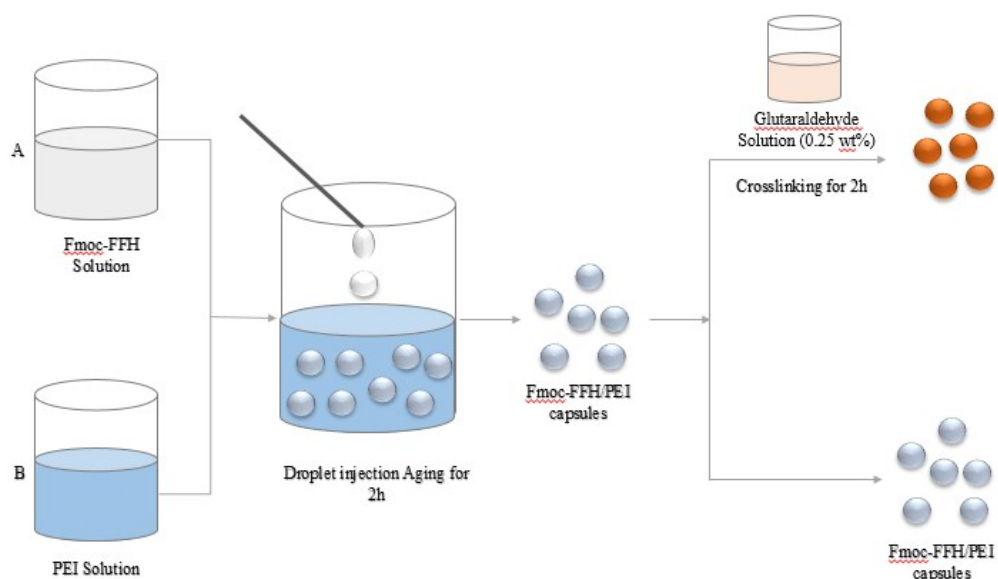

**Fig. S3** Schematic illustration for the formation of Fmoc-FFH//PEI hybrid capsules and Fmoc-FFH//PEI/GA hybrid capsules. The default conditions: Fmoc-FFH: 4 mg mL<sup>-1</sup>, PEI: 1.0wt%, pH of solution A: 9.0, pH of solution B: 8.0.

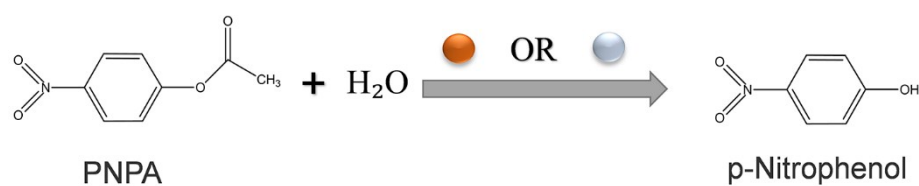

**Fig. S4** The hydrolysis process of PNPA in the presence of hybrid capsules.

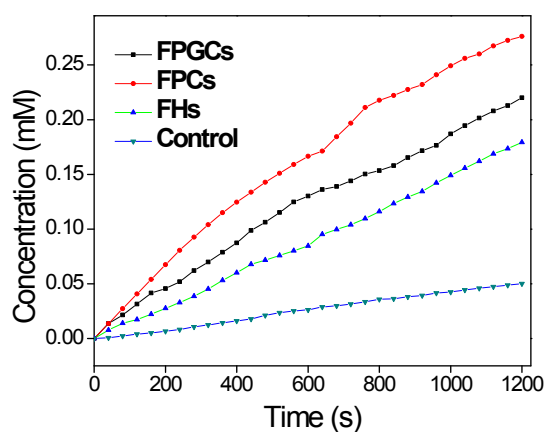

**Fig. S5** The hydrolysis activity of PNPA determined in a SpectraMax microplate reader (Molecular Devices, Sunnyvale, CA, USA).

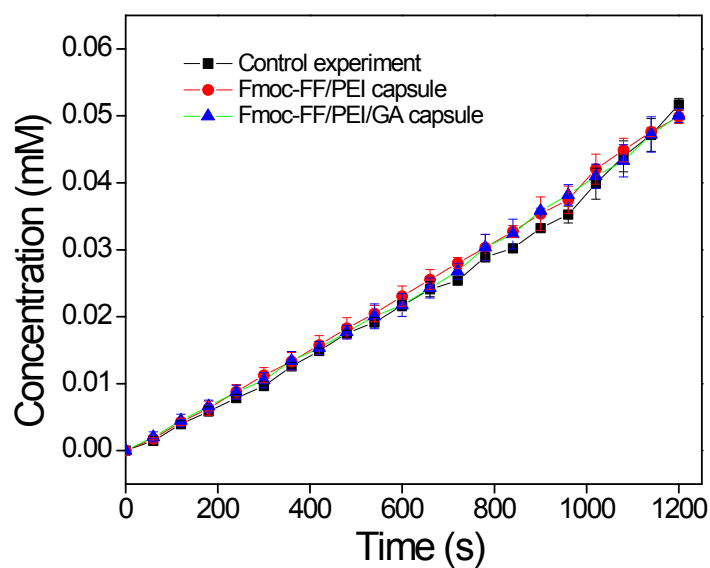

**Fig. S6** The hydrolysis of PNPA in the absence and presence of Fmoc-FF/PEI capsules or Fmoc-FF/PEI/GA capsules.

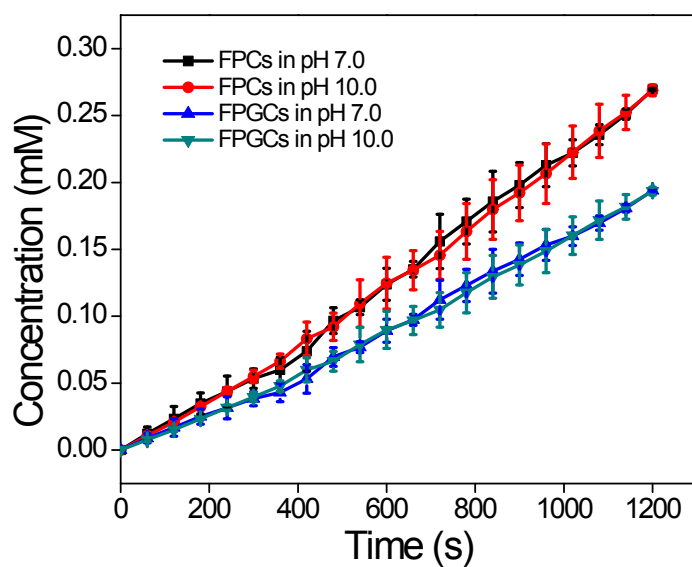

**Fig. S7** The hydrolysis activity of PNPA using different capsules as catalyst.
